# Supplementary material for: Euphormins A and B, New Pyranocoumarin Derivatives from Euphorbia formosana Hayata, and Their Anti-Inflammatory Activity
Source: MDPI journal article supplement (doi:10.3390/molecules27061885), 2022-03-14
Supplement: s1 [file s1]

Supplementary File

# Euphormins A and B, New Pyranocoumarin Derivatives from *Euphorbia formosana* Hayata, and Their Anti-Inflammatory Activity

Yu-Hsuan Lan <sup>1,\*</sup>, I-Hsiao Chen <sup>2</sup>, Hsin-Hung Lu <sup>3</sup>, Ting-Jing Guo <sup>3</sup>, Tsong-Long Hwang <sup>3,4,5</sup> and Yann-Lii Leu <sup>3,6,\*</sup>

<sup>1</sup> School of Pharmacy, China Medical University, Taichung 406, Taiwan

<sup>2</sup> Department of Medical Laboratory Science, College of Medical Science and Technology, I Shou University, Kaohsiung 824, Taiwan; fantasyp@isu.edu.tw

<sup>3</sup> Graduate Institute of Natural Products, College of Medicine, Chang Gung University, Taoyuan 333, Taiwan; sandra6132004@gmail.com (H.-H.L.); soulive12@hotmail.com (T.-J.G.); htl@mail.cgu.edu.tw (T.-L.H.)

<sup>4</sup> Research Center for Chinese Herbal Medicine, Graduate Institute of Healthy Industry Technology, College of Human Ecology, Chang Gung University of Science and Technology, Taoyuan 333, Taiwan

<sup>5</sup> Department of Anesthesiology, Chang Gung Memorial Hospital, Taoyuan 333, Taiwan

<sup>6</sup> Tissue Bank, Chang Gung Memorial Hospital at Linkou, Taoyuan 333, Taiwan

\* Correspondence: lanyh@mail.cmu.edu.tw (Y.-H.L.); ylleu@mail.cgu.edu.tw (Y.-L.L.); Tel.: +886-4-22053366 (ext. 5138) (Y.-H.L.); +886-3-2118800 (ext. 5524) (Y.-L.L.)

## SUPPLEMENTARY INFORMATION

Figure S1: IR spectrum of euphormin-A.

Figure S2: UV spectrum of euphormin-A.

Figure S3: Mass spectrum of euphormin-A.

Figure S4:  $^1\text{H}$ -NMR (400 MHz,  $\text{CD}_3\text{OD}$ ) spectrum of euphormin-A.

Figure S5:  $^{13}\text{C}$ -NMR (100 MHz,  $\text{CD}_3\text{OD}$ ) spectrum of euphormin-A.

Figure S6:  $^1\text{H}$ - $^1\text{H}$  COSY spectrum of euphormin-A.

Figure S7:  $^1\text{H}$ - $^1\text{H}$  NOESY spectrum of euphormin-A.

Figure S8: HSQC spectrum of euphormin-A.

Figure S9: HMBC spectra of euphormin-A.

Figure S10: IR spectrum of euphormin-B.

Figure S11: UV spectrum of euphormin-B.

Figure S12: Mass spectrum of euphormin-B.

Figure S13:  $^1\text{H}$ -NMR (400 MHz,  $\text{D}_2\text{O}$ ) spectrum of euphormin-B.

Figure S14:  $^{13}\text{C}$ -NMR (100 MHz,  $\text{D}_2\text{O}$ ) spectrum of euphormin-B.

Figure S15:  $^1\text{H}$ - $^1\text{H}$  COSY spectrum of euphormin-B.

Figure S16:  $^1\text{H}$ - $^1\text{H}$  NOESY spectrum of euphormin-B.

Figure S17: HSQC spectrum of euphormin-B.

Figure S18: HMBC spectra of euphormin-B.

Figure S19: Inhibitory effect of compounds **1**, **2**, **10**, **18**, **25**, and **33** from *E. formosana* on superoxide anion generation and elastase release by human neutrophils in response to fMLP/CB.

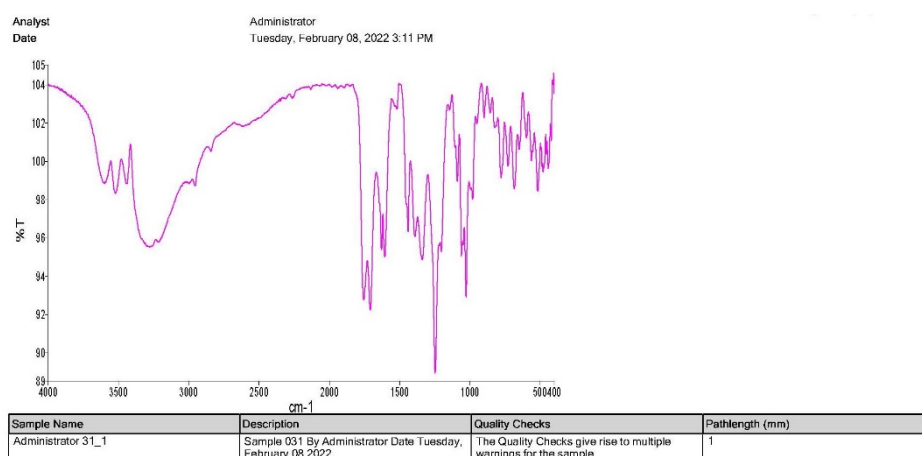

**Figure S1.** IR spectrum of euphormin-A.

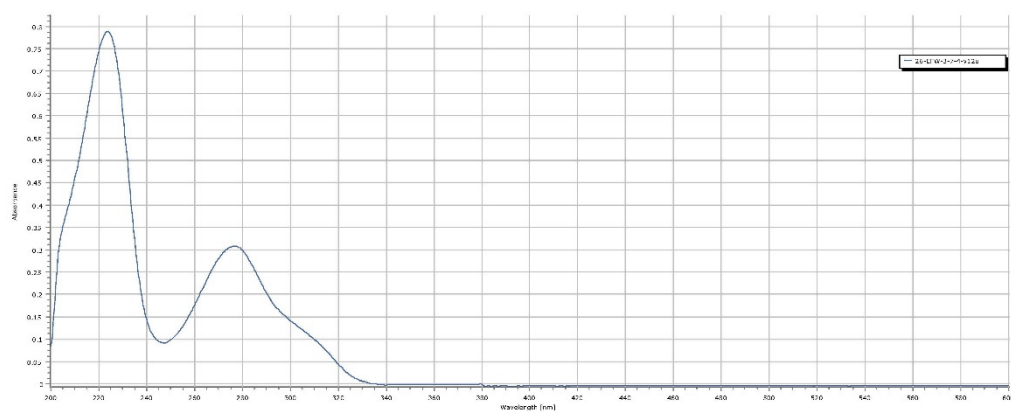

**Figure S2.** UV spectrum of euphormin-A.

F:\Exp\_data\SAMPLE\2021\20211206\55-L01

2021/12/6 下午 03:26:38

55-L01 #1-20 RT: 0.00-0.06 AV: 20 NL: 2.67E5

T: ITMS - c ESI Full ms [150.00-2000.00]

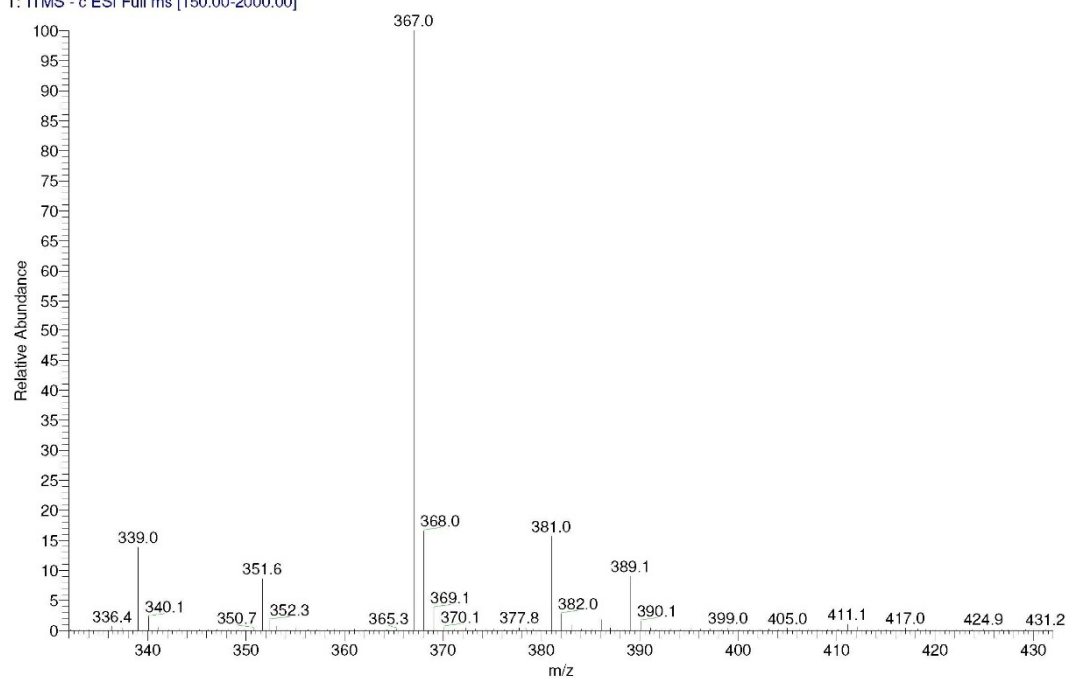

**Figure S3.** Mass spectrum of euphormin-A.

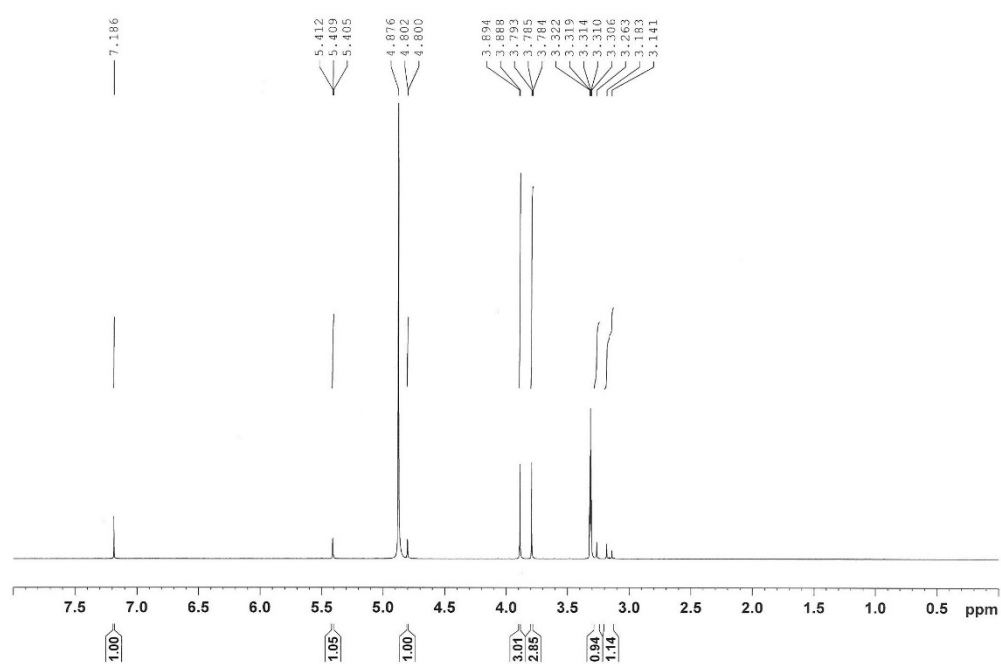

**Figure S4.**  $^1\text{H}$ -NMR (400 MHz,  $\text{CD}_3\text{OD}$ ) spectrum of euphormin-A.

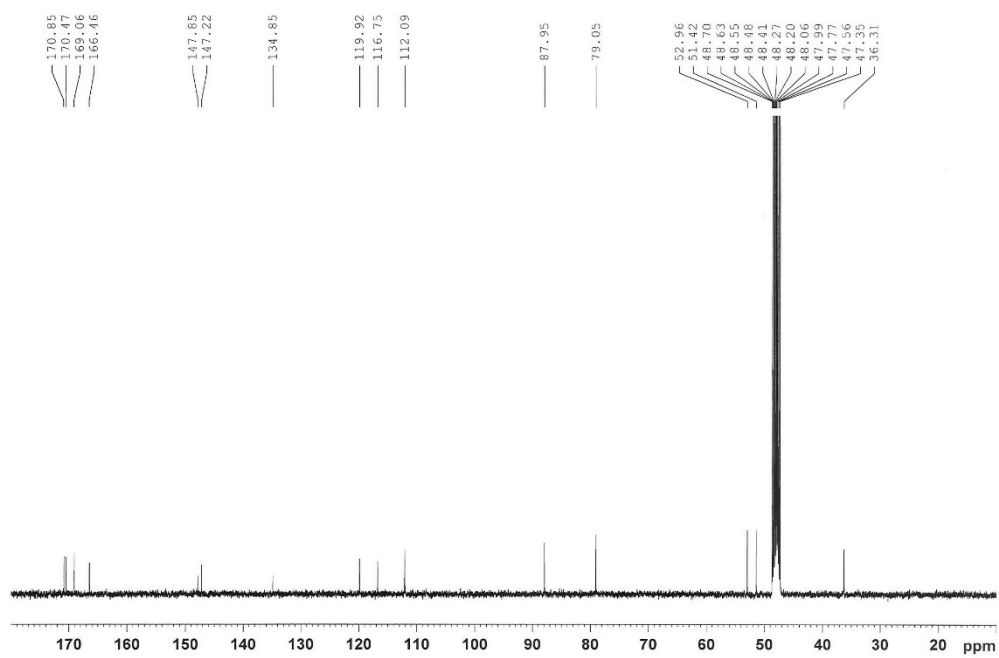

**Figure S5.**  $^{13}\text{C}$ -NMR (100 MHz,  $\text{CD}_3\text{OD}$ ) spectrum of euphormin-A.

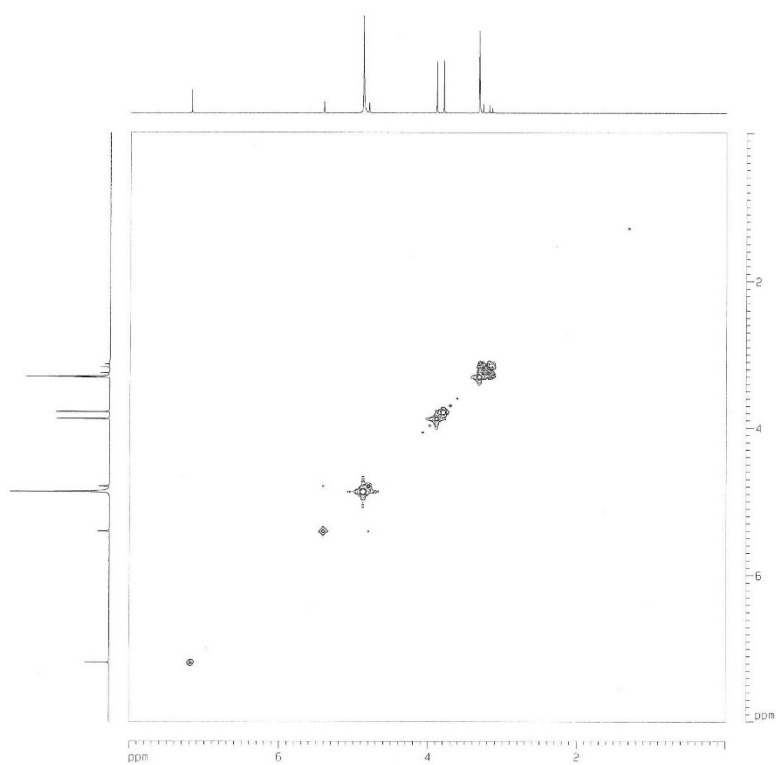

**Figure S6.**  $^1\text{H}$ - $^1\text{H}$  COSY spectrum of euphormin-A.

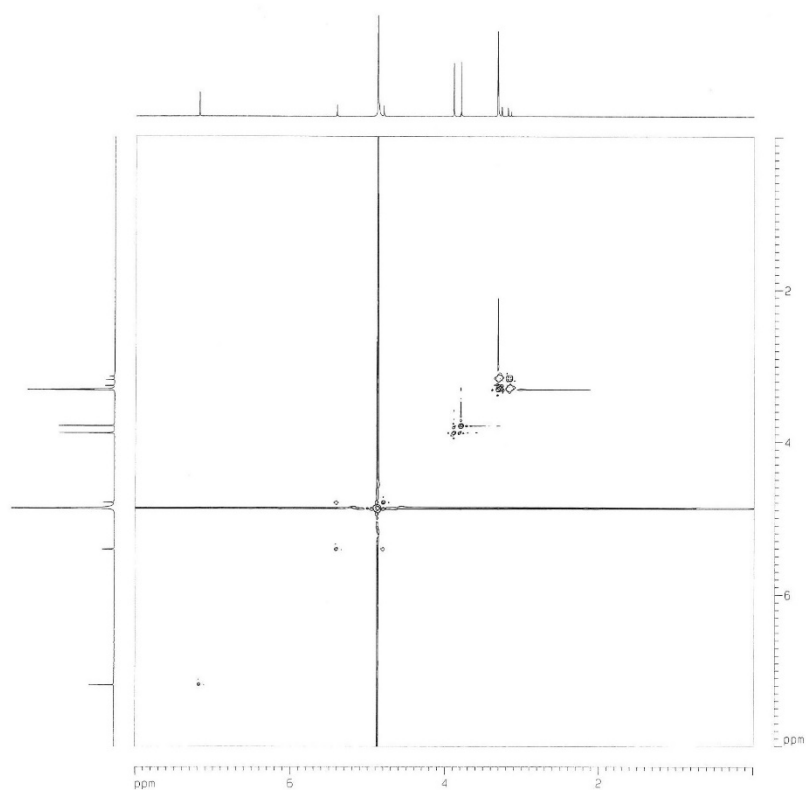

**Figure S7.**  $^1\text{H}$ - $^1\text{H}$  NOESY spectrum of euphormin-A.

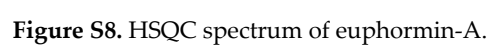

**Figure S8.** HSQC spectrum of euphormin-A.

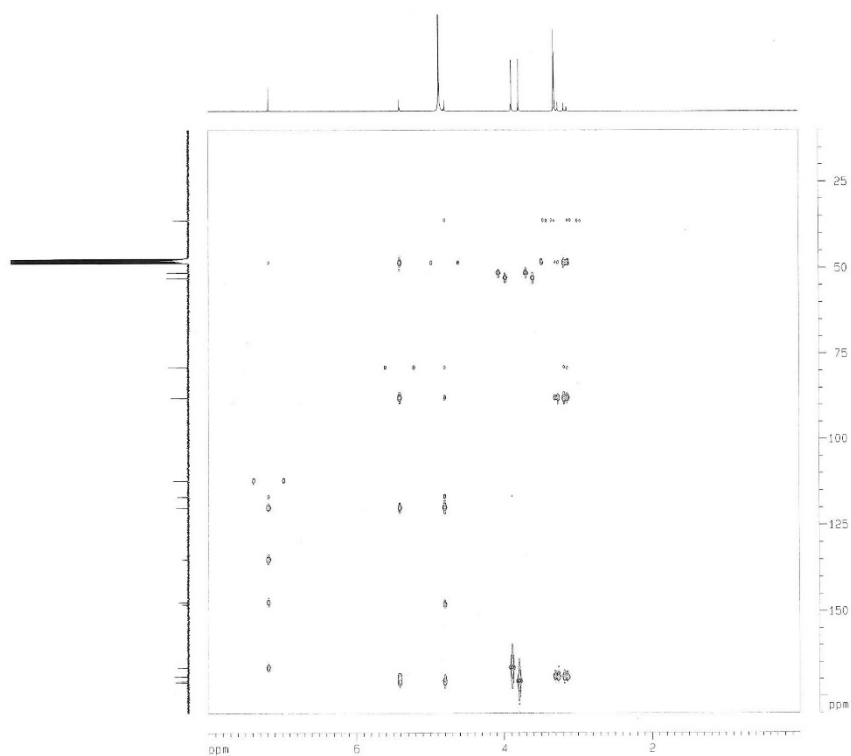

**Figure S9.** HMBC spectrum of euphormin-A.

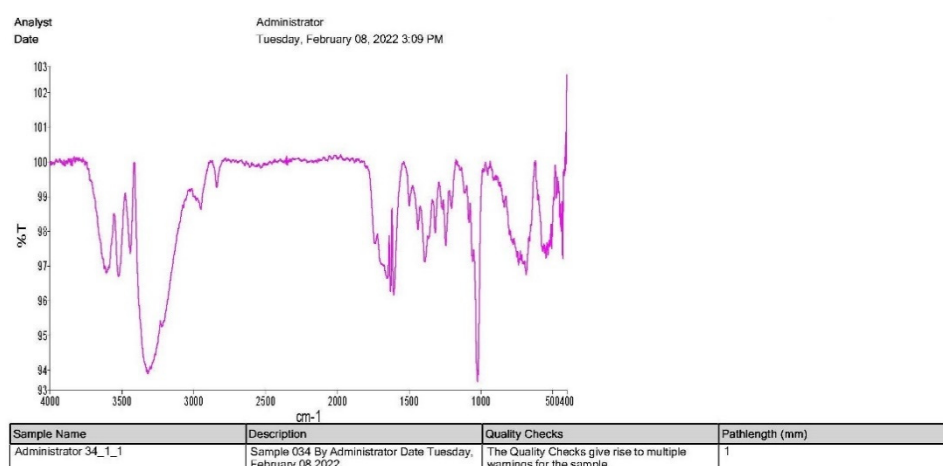

**Figure S10.** IR spectrum of euphormin-B.

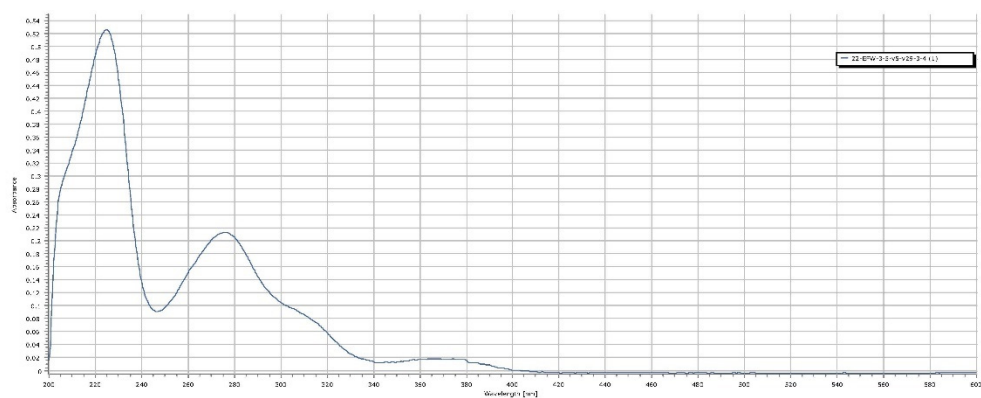

Figure S11. UV spectrum of euphormin-B.

F:\Exp\_data\SAMPLE\2021\20211206\44-L02

2021/12/6 下午 02:59:17

44-L02 #1-20 RT: 0.00-0.06 AV: 20 NL: 2.03E5

T: ITMS - c ESI Full ms [150.00-2000.00]

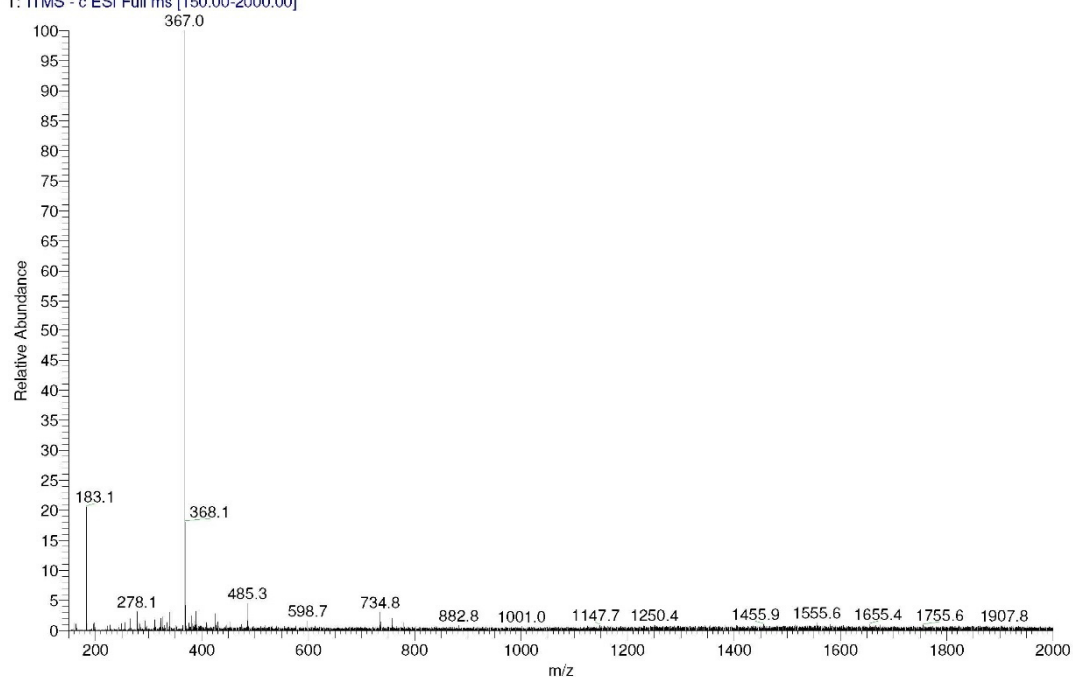**Figure S12.** Mass spectrum of euphormin-B.

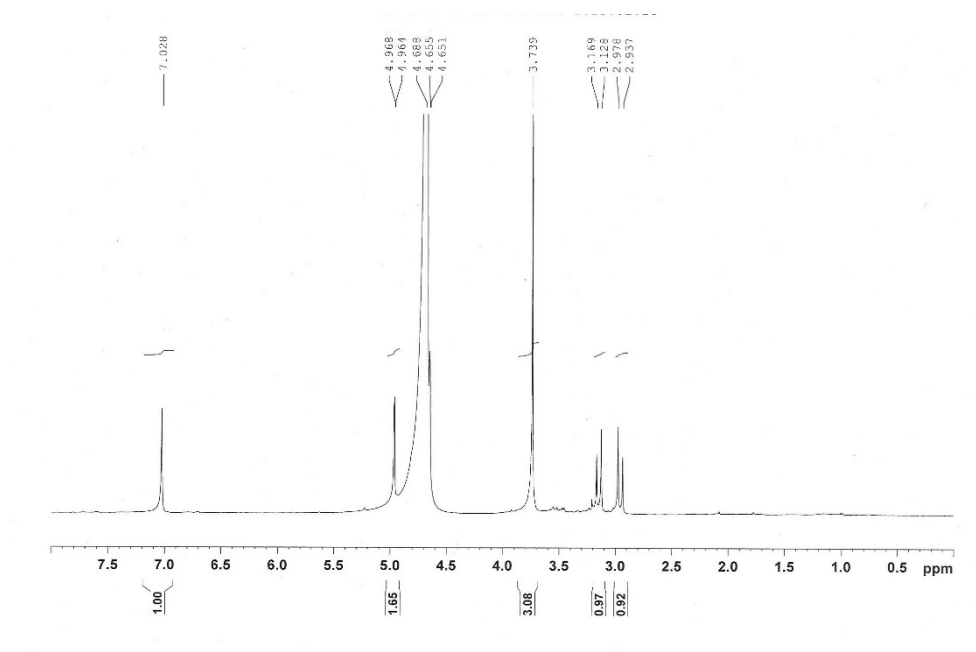

**Figure S13.**  $^1\text{H}$ -NMR (400 MHz,  $\text{D}_2\text{O}$ ) spectrum of euphormin-B.

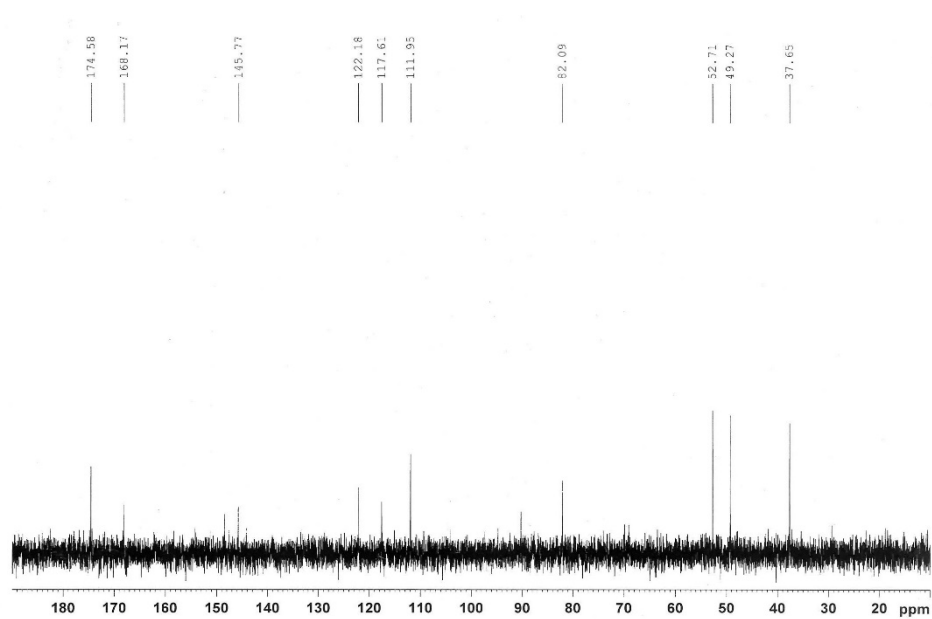

**Figure S14.**  $^{13}\text{C}$ -NMR (100 MHz,  $\text{D}_2\text{O}$ ) spectrum of euphormin-B.

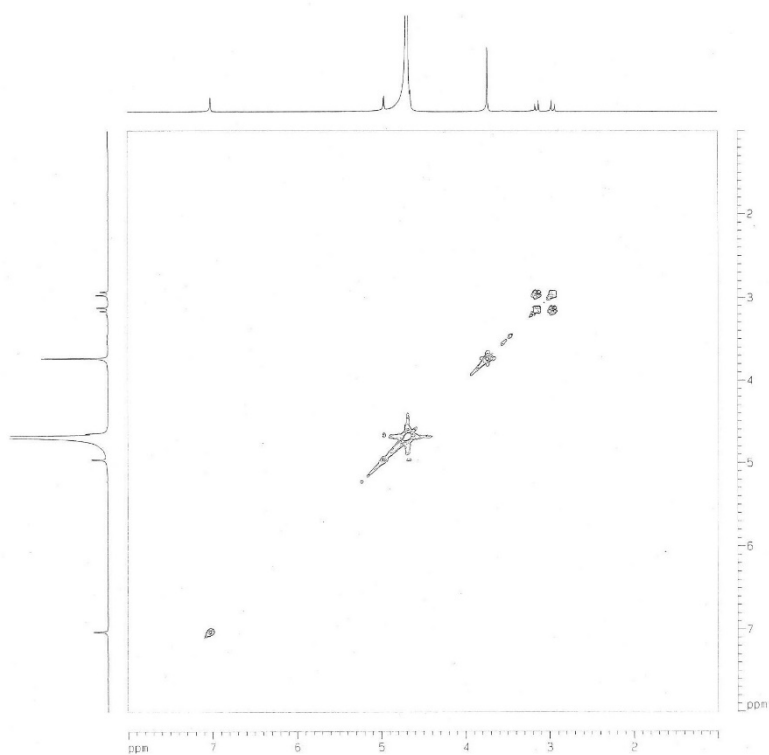

**Figure S15.**  $^1\text{H}$ - $^1\text{H}$  COSY spectrum of euphormin-B.

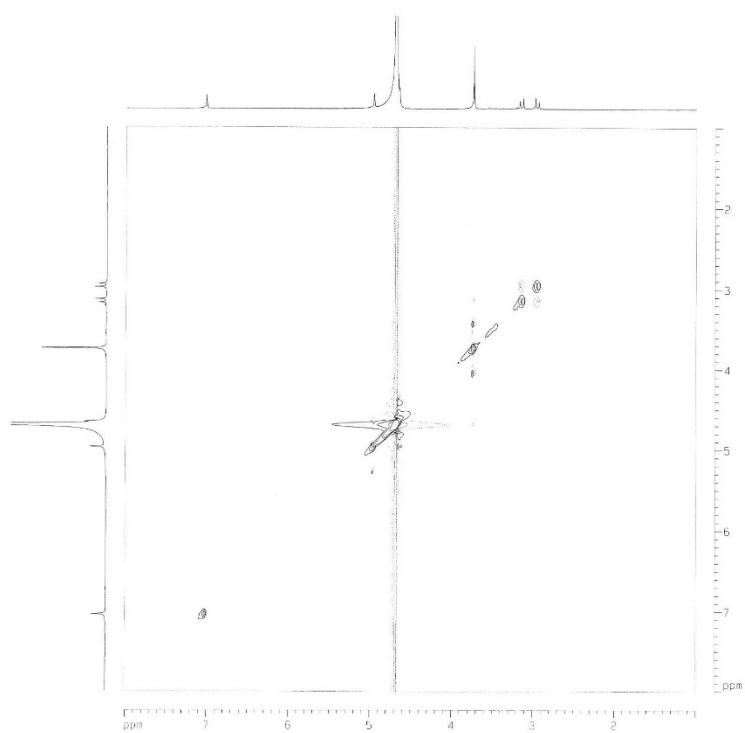

**Figure S16.**  $^1\text{H}$ - $^1\text{H}$  NOESY spectrum of euphormin-B.

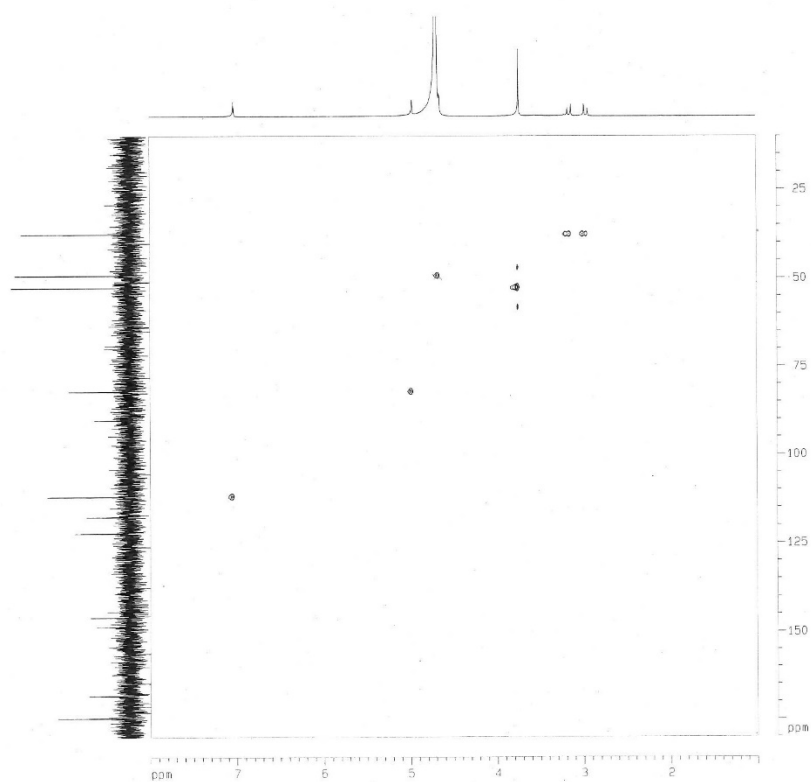

**Figure S17.** HSQC spectrum of euphormin-B.

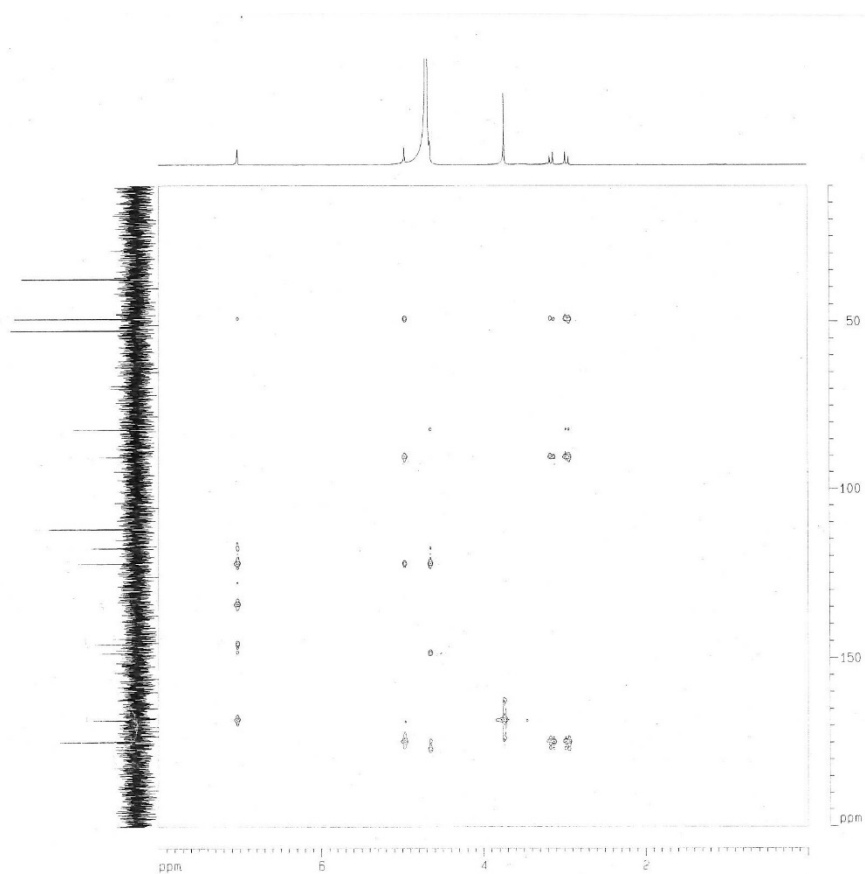

**Figure S18.** HMBC spectrum of euphormin-B.

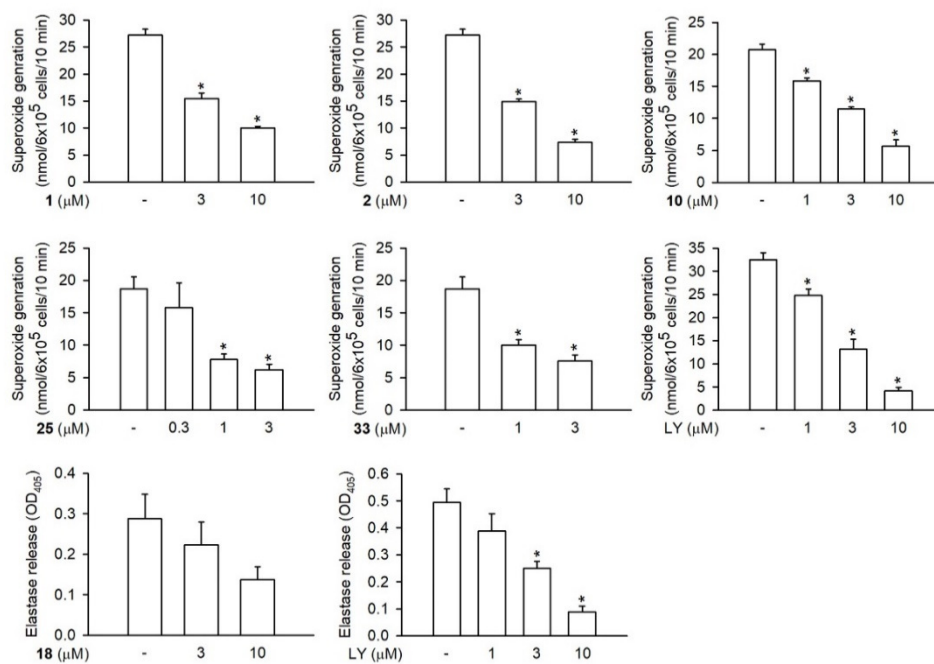

**Figure S19.** Inhibitory effect of compounds 1, 2, 10, 18, 25, and 33 from *E. formosana* on superoxide anion generation and elastase release by human neutrophils in response to fMLP/CB.
